# Supplementary material
Source: PubMed Central journal article supplement (PMC4824195)
Supplement: NIHMS773322-supplement-Supplementary_eTable.pdf [file NIHMS773322-supplement-Supplementary_eTable.pdf]

## Supplementary Online Content

Tevis SE, Weber SM, Kent KC, Kennedy GD. Nomogram to predict postoperative readmission in patients who undergo general surgery. *JAMA Surg*. Published online April 22, 2015. doi:10.1001/jamasurg.2014.4043.

### **eTable.** Variables Associated With Readmission on Univariate Analysis

This supplementary material has been provided by the authors to give readers additional information about their work.

**eTable.** Variables Associated With Readmission on Univariate Analysis

| Variable                      | Not Readmitted | Readmitted | P value |
|-------------------------------|----------------|------------|---------|
| ASA classification            |                |            | .039    |
| 1-2                           | 1654 (91)      | 170 (9)    |         |
| 3-4                           | 860 (88)       | 115 (12)   |         |
| Functional status             |                |            | .049    |
| Independent                   | 2450 (90)      | 272 (10)   |         |
| Dependent                     | 64 (83)        | 13 (16)    |         |
| Weight loss                   |                |            | .010    |
| Absent                        | 2392 (90)      | 261 (10)   |         |
| Present                       | 122 (84)       | 24 (16)    |         |
| Steroids                      |                |            | <.001   |
| Absent                        | 2337 (90)      | 248 (10)   |         |
| Present                       | 177 (82)       | 37 (17)    |         |
| Bleeding disorder             |                |            | <.001   |
| Absent                        | 2428 (90)      | 260 (10)   |         |
| Present                       | 86 (78)        | 25 (22)    |         |
| Procedure length              |                |            | <.001   |
| <75 <sup>th</sup> percentile* | 1919 (91)      | 182 (9)    |         |
| >75 <sup>th</sup> percentile* | 595 (85)       | 103 (15)   |         |
| Surgical specialty            |                |            | .001    |
| Advanced MIS                  | 324 (95)       | 19 (5)     |         |
| Colorectal                    | 926 (88)       | 130 (12)   |         |
| General surgery               | 781 (91)       | 74 (9)     |         |
| HPB & soft tissue oncology    | 483 (89)       | 62 (11)    |         |
| Wound class                   |                |            | <.001   |
| Clean                         | 722 (94)       | 48 (6)     |         |
| Clean-contaminated            | 1459 (88)      | 195 (12)   |         |
| Contaminated                  | 274 (90)       | 30 (10)    |         |
| Dirty                         | 59 (83)        | 12 (17)    |         |
| In-hospital complications     |                |            | <.001   |
| Absent                        | 2094 (91)      | 202 (9)    |         |
| Present                       | 420 (84)       | 83 (16)    |         |
| Length of stay                |                |            | <.001   |
| ≤ 7 days                      | 2071 (92)      | 178 (8)    |         |
| > 7 days                      | 443 (81)       | 107 (19)   |         |
| Discharge level of care       |                |            | .010    |
| Same as admission             | 2405 (90)      | 263 (10)   |         |
| Higher than admission         | 109 (83)       | 22 (17)    |         |

The following variables were not found to be significantly associated with readmission and therefore are not included in the above table: gender, age, BMI ≥ 30, diabetes, smoker, ascites, COPD, renal insufficiency, dialysis dependent, disseminated cancer, pre-operative transfusion, hypertension, dyspnea, CHF.

\* 75<sup>th</sup> percentile within surgical specialty
